# Supplementary material for: Frontiers in Operations: Battery as a Service: Flexible Electric Vehicle Battery Leasing
Source: Atypon-hosted journal article supplement (doi:10.1287/msom.2022.0587), 2024-02-27
Supplement: msom.2022.0587.sm1.pdf [file msom.2022.0587.sm1.pdf]

# Online Appendix to “Battery as a Service: Flexible Electric Vehicle Battery Leasing”

Lingling Shi

DeGroote School of Business, McMaster University

Hamilton, Ontario L8S 4L8, Canada, lingling.shi@mcmaster.ca

Bin Hu

Naveen Jindal School of Management, University of Texas at Dallas

Richardson, TX 75080, USA, bin.hu@utdallas.edu

*Proof of Lemma 1.* The total cost of leasing high-capacity batteries in two periods is

$$p_h + \rho(d - r_h)^+ + (1 - \rho)\mathbb{E}[(D - r_h)^+] = p_h + \rho(d - r_h)^+ + (1 - \rho)(a - r_h)^2/(2a),$$

and the total cost of leasing low-capacity batteries is  $\rho d + (1 - \rho)\mathbb{E}[D] = \rho d + a(1 - \rho)/2$ .

We compare the total costs of leasing high- and low-capacity batteries. It is trivial to find that all customers lease high- or low-capacity batteries when  $d \geq r_h$ . So we focus on  $d < r_h$ , where the total cost of leasing high-capacity batteries is  $p_h + (1 - \rho)(a - r_h)^2/(2a)$ .

$$p_h + (1 - \rho)(a - r_h)^2/(2a) > \rho d + a(1 - \rho)/2 \iff d < [2ap_h - (1 - \rho)r_h(2a - r_h)]/[2a\rho].$$

So the low-capacity battery lease volume is  $[2ap_h - (1 - \rho)r_h(2a - r_h)]/[2a\rho]$ . We have  $[(1 - \rho)r_h - (1 - \rho)r_h^2/(2a)] \leq p_h \leq [(1 - \rho)r_h - (1 - \rho)r_h^2/(2a) + \rho]$ ; a lower primary lease rate would lead to the trivial case of all customers leasing high-capacity batteries, and a higher primary lease rate would lead to the trivial case of all customers leasing low-capacity batteries.  $\square$

*Proof of Proposition 1.* In the simple battery lease program, the manufacturer’s problem is

$$\max_{p_h} \{(p_h - c_h)(1 - \tau) : \tau = [2ap_h - (1 - \rho)r_h(2a - r_h)]/[2a\rho]\}.$$

which is concave in  $p_h$  as the second-order derivative is negative. So the first-order condition yields the optimal price  $p_h^b = [(1 - \rho)(2ar_h - r_h^2) + 2a(c_h + \rho)]/(4a)$ , and the maximized profit is  $\Pi^b = [(1 - \rho)(2ar_h - r_h^2) - 2a(c_h - \rho)]^2/(16\rho a^2)$ .

$$\partial p_h^b / \partial a = (1 - \rho)r_h^2/(4a^2) > 0, \quad \partial p_h^b / \partial r_h = (1 - \rho)(a - r_h)/(2a) > 0,$$

$$\partial p_h^b / \partial c_h = 1/2, \quad \partial p_h^b / \partial \rho = (2a - 2ar_h + r_h^2)/(4a).$$

So  $p_h^b$  increases in  $a$ ,  $r_h$ ,  $c_h$ , and increases in  $\rho$  if  $2a - 2ar_h + r_h^2 > 0$  but decreases otherwise.

Accordingly, the low-capacity battery lease volume is  $\tau^b = [2a(c_h + \rho) - (1 - \rho)(2ar_h - r_h^2)]/(4a\rho)$ . We have  $(1 - \rho)(2ar_h - r_h^2)/(2a) - \rho < c_h < (1 - \rho)(2ar_h - r_h^2)/(2a) + \rho$ , otherwise all customers lease low- or high-capacity batteries.

$$\begin{aligned}\partial\tau^b/\partial a &= -(1 - \rho)r_h^2/(4\rho a^2) < 0, \quad \partial\tau^b/\partial r_h = -(1 - \rho)(a - r_h)/(2a\rho) < 0, \\ \partial\tau^b/\partial c_h &= 1/2(\rho) > 0, \quad \partial\tau^b/\partial \rho = -(2ac_h - 2ar_h + r_h^2)/(4a\rho^2).\end{aligned}$$

So  $\tau^b$  decreases in  $a$ ,  $r_h$ , increases in  $c_h$ , and increases in  $\rho$  if  $2ac_h - 2ar_h + r_h^2 < 0$  but decreases otherwise. Recall that we assume  $r_l = 0$ . So the total battery capacity is

$$BT^b = (1 - \tau^b)r_h = [2a(\rho - c_h) + (1 - \rho)(2ar_h - r_h^2)]r_h/(4a\rho).$$

We then compute total customer cost. A customer's total cost of leasing low-capacity batteries is

$$CT_l^b = \rho\mathbb{E}[d] + (1 - \rho)\mathbb{E}[D] = \rho\tau^b/2 + a(1 - \rho)/2.$$

A customer's total cost of leasing high-capacity batteries is

$$\begin{aligned}CT_h^b &= \rho(\mathbb{E}[(d - r_h)^+] + p_h^b) + (1 - \rho)(\mathbb{E}[(D - r_h)^+] + p_h^b) \\ &= \rho(1 - r_h)^2/(2(1 - \tau^b)) + (1 - \rho)(a - r_h)^2/(2a) + p_h^b\end{aligned}$$

when  $r_h \leq 1$ , and  $CT_h^b = (1 - \rho)(a - r_h)^2/(2a) + p_h^b$  when  $r_h > 1$ .

Then, the total customer cost is  $CT^b = \tau^b CT_l^b + (1 - \tau^b)CT_h^b$ , which is  $[16\rho(1 - \rho)a^3 - r_h^4(1 - \rho)^2 + 4ar_h^2(1 - \rho)(r_h - c_h + \rho(1 - r_h)) + 4a^2((7 - 3(2 - r_h)r_h)\rho^2 - (c_h - r_h)^2 + 2\rho(c_h - r_h)(1 - r_h))]/(32\rho a^2)$  for  $r_h \leq 1$ , and  $[16\rho(1 - \rho)a^3 - (r_h^4(1 - \rho)^2 + 4a^2(c_h - r_h(1 - \rho) + \rho)(r_h - c_h + \rho(3 - r_h)) + 4ar_h^2(1 - \rho)(r_h - c_h + (1 - r_h)\rho)]/(32\rho a^2)$  for  $r_h > 1$ .  $\square$

*Proof of Lemma 2.* We first solve for the peak-period upgrade volume. Recall customers' peak-period costs in Table 1. A customer leasing low-capacity batteries decides to upgrade if and only if  $(D - r_h)^+ + \bar{p}_h \leq D$ .

- $D \geq r_h$ . The peak-period cost is  $D - r_h + \bar{p}_h$  for high-capacity batteries, and  $D$  for low-capacity batteries. A customer chooses high-capacity batteries if  $D - r_h + \bar{p}_h \leq D \iff \bar{p}_h \leq r_h$ , and low-capacity batteries otherwise.
- $D < r_h$ . The peak-period cost is  $\bar{p}_h$  for high-capacity batteries, and  $D$  for low-capacity batteries. When  $\bar{p}_h > r_h$ , all customers choose low-capacity batteries as  $D < r_h < \bar{p}_h$ . When  $\bar{p}_h \leq r_h$ , a customer chooses low-capacity batteries if  $D < \bar{p}_h$  and high-capacity batteries otherwise.

To summarize, no upgrade happens when  $\bar{p}_h > a$ . Otherwise, a customer leasing low-capacity batteries upgrades if  $D \geq \bar{p}_h$ , i.e.,  $\mathbb{P}(D \geq \bar{p}_h) = (a - \bar{p}_h)/a$ . Given the regular-period low-capacity battery lease volume  $\tau$ , the peak-period upgrade volume is  $\tau(a - \bar{p}_h)/a$ .

Similarly, we can solve for the peak-period downgrade volume. From Table [1](#), a customer leasing high-capacity batteries downgrades if and only if  $(D - r_h)^+ + p_h > D + \bar{p}_l$ .

- $D \geq r_h$ . A customer chooses low-capacity batteries if  $D - r_h + p_h > D + \bar{p}_l \iff \bar{p}_l < p_h - r_h$ , and high-capacity batteries otherwise.
- $D < r_h$ . A customer chooses low-capacity batteries if  $p_h > D + \bar{p}_l \iff D < p_h - \bar{p}_l$ .

To summarize, no downgrade happens if  $\bar{p}_l > p_h$ . If  $\bar{p}_l < p_h - a$ , all customers downgrade. If  $p_h - a \leq \bar{p}_l \leq p_h$ , a customer leasing high-capacity batteries downgrades if  $D < p_h - \bar{p}_l$ , i.e., is  $\mathbb{P}(D < p_h - \bar{p}_l) = (p_h - \bar{p}_l)/a$ . Given the regular-period high-capacity battery lease volume  $1 - \tau$ , the peak-period downgrade volume is  $(1 - \tau)(p_h - \bar{p}_l)/a$ .  $\square$

*Proof of Lemma [3](#).* The peak up/downgrade volumes imply an additional acquisition of high-capacity batteries  $Q_h = \tau(a - \bar{p}_h)/a - (1 - \tau)(p_h - \bar{p}_l)/a$  to meet the peak demand. We insert this equality to the manufacturer's peak-period problem [\(1\)](#), and obtain  $\bar{p}_h^f(p_h) = [a + c_h/(1 - \rho)]/2$ ,  $\bar{p}_l^f(p_h) = p_h - c_h/(2 - 2\rho)$ . Accordingly,  $Q_h^f(p_h) = [\tau - c_h/(a(1 - \rho))]/2$  and the peak-period profit is  $[c_h^2/(a(1 - \rho)^2) + a\tau - 2\tau c_h/(1 - \rho) + 4(1 - \tau)p_h]/4$ .  $\square$

*Proof of Lemma [4](#).* We first derive the expected peak-period costs. A customer leasing low-capacity batteries upgrades if  $D \geq \bar{p}_h$  in the peak period and keeps low-capacity batteries otherwise. So we obtain the expected peak-period cost by breaking up the integrals into two parts, which differs on using high- or low-capacity batteries in peak period.

$$\begin{aligned} \mathbb{E}[c_l(D)] &= \frac{\bar{p}_h}{a} \int_0^{\bar{p}_h} Df(D)dD + \frac{a - \bar{p}_h}{a} \int_{\bar{p}_h}^a ((D - r_h)^+ + \bar{p}_h)f(D)dD \\ &= \frac{a^2 - 2ar_h + r_h^2 + (2a - \bar{p}_h)\bar{p}_h}{2a}. \end{aligned}$$

Similarly, a customer leasing high-capacity batteries downgrades if  $D < p_h - \bar{p}_l$  in the peak period and keeps high-capacity batteries otherwise. The expected peak-period cost is

$$\begin{aligned} \mathbb{E}[c_h(D)] &= \frac{p_h - \bar{p}_l}{a} \int_0^{p_h - \bar{p}_l} (D + \bar{p}_l)f(D)dD + \frac{a - p_h + \bar{p}_l}{a} \int_{p_h - \bar{p}_l}^a ((D - r_h)^+ + p_h)f(D)dD \\ &= \frac{a^2 - 2ar_h + r_h^2 - (p_h - \bar{p}_l)^2 + 2ap_h}{2a}. \end{aligned}$$

If a customer leases high- or low-capacity batteries in the regular period, the total cost in two periods is  $\rho[p_h + (d - r_h)^+] + (1 - \rho)\mathbb{E}[c_h(D)]$  or  $\rho d + (1 - \rho)\mathbb{E}[c_l(D)]$ . The indifferent cost must happen when  $d < r_h$ , otherwise all customers lease high- or low-capacity batteries. A customer

leases low-capacity batteries at the beginning if  $\rho d < \rho p_h + (1 - \rho)(\mathbb{E}[c_h(D)] - \mathbb{E}[c_l(D)])$  and high-capacity batteries otherwise. The low-capacity battery lease volume is

$$\tau = [2ap_h - (1 - \rho)((p_h - \bar{p}_l)^2 + 2a\bar{p}_h - \bar{p}_h^2)]/[2a\rho],$$

and the high-capacity volume is

$$1 - \tau = [2a(\rho - p_h) + (1 - \rho)((p_h - \bar{p}_l)^2 + 2a\bar{p}_h - \bar{p}_h^2)]/[2a\rho].$$

Inserting  $\bar{p}_h^f(p_h)$  and  $\bar{p}_l^f(p_h)$ , the low-capacity lease volume is  $\tau^f(p_h) = [8p_h - 2c_h - 3a(1 - \rho)]/(8\rho)$ , and the high-capacity lease volume is  $1 - \tau^f(p_h) = [8\rho + 3a(1 - \rho) + 2c_h - 8p_h]/(8\rho)$ .  $\square$

*Proof of Proposition 2.* (i) With  $\tau^f(p_h)$  in Lemma 4, we solve the manufacturer's regular-period problem (2). The second-order derivative of the regular-period problem wrt  $p_h$  is  $-2/\rho$ , so the F.O.C yields the optimal  $p_h^f = [6c_h + 5a(1 - \rho) + 8\rho]/16$ . The optimal up/downgrade rates and high-capacity battery acquisition quantity are

$$\bar{p}_h^f = [a + c_h/(1 - \rho)]/2, \quad \bar{p}_l^f = [c_h(6 - 8/(1 - \rho)) + 5a(1 - \rho) + 8\rho]/16,$$

$$Q_h^f = [a(1 - \rho)(2c_h + \rho(8 + a) - a) - 16\rho c_h]/[32a\rho(1 - \rho)],$$

the low-capacity lease volume is  $\tau^f = (2c_h + \rho(8 + a) - a)/(16\rho)$ , and the maximized profit is

$$\Pi^f = [a\rho(1 - \rho)(2(40 - a)(a - 2c_h) + 64\rho - (80 - a)a\rho) + a(1 - \rho)(a - 2c_h)^2 + 64\rho c_h^2]/[256a\rho(1 - \rho)].$$

Here,  $\bar{p}_h^f, \tau^f$  increases in  $c_h$  and  $Q_h^f$  decreases in  $c_h$ . Moreover, the upgrade volume  $\tau^f(a - \bar{p}_h^f)/a$  and the proportion of additional battery acquisition over peak-period upgrade volume  $Q_h^f/[\tau^f(a - \bar{p}_h^f)/a]$  decrease in  $c_h$ . We can check the conditions for  $\bar{p}_h^f \leq a$  and  $\bar{p}_l^f \geq p_h^f - a$ . We then check the nonnegativity of high-capacity battery acquisition quantity.

$$Q_h^f > 0 \iff c_h < a(1 - \rho)/2.$$

The cost threshold increases in  $a$  and decreases in  $\rho$ .

(ii) Next we optimize the manufacturer's problems with  $Q_h = 0$  for  $c_h \geq a(1 - \rho)/2$ .

From the supply and demand equation in the peak period, we have  $\bar{p}_h^f(\bar{p}_l) = a - (1 - \tau)(p_h - \bar{p}_l)/\tau$ .

Substituting  $\bar{p}_h^f(\bar{p}_l)$  into the peak-period problem, the second-order derivative is negative, so the

F.O.C yields the optimal  $\bar{p}_l^f(p_h) = p_h - a\tau/2$ ,  $\bar{p}_h^f(p_h) = a(1 + \tau)/2$ , and the corresponding profit is

$$(1 - \tau)(a\tau + 4p_h)/4.$$

Inserting  $\bar{p}_h^f(p_h)$ ,  $\bar{p}_l^f(p_h)$  into Lemma 4, the low-capacity battery lease volume becomes  $\tau^f(p_h) = [8p_h - 3a(1 - \rho)]/[2a(1 - \rho) + 8\rho]$ . Then we solve the regular-period problem and obtain

$$p_h^f = \frac{13a^2(1 - \rho)^2 + 32\rho(c_h + \rho) + 4a(1 - \rho)(2c_h + 9\rho)}{32a(1 - \rho) + 64\rho}.$$

The optimal up/downgrade rates are

$$\bar{p}_h^f = \frac{a[9a(1 - \rho) + 8(c_h + 3\rho)]}{16a(1 - \rho) + 32\rho}, \quad \bar{p}_l^f = \frac{32\rho(c_h + \rho) + 4a\rho(5 - 9\rho) - 8ac_h(1 + \rho) + a^2(1 - \rho)(11 - 13\rho)}{32a(1 - \rho) + 64\rho},$$

the low-capacity battery lease volume is  $\tau^f = [a - a\rho + 8(c_h + \rho)]/[8(a + 2\rho - a\rho)]$ , and the maximized profit is  $\Pi^f = [8(c_h - \rho) + 7a(1 - \rho)]^2/[128(a(1 - \rho) + 2\rho)]$ .

Here,  $\bar{p}_h^f$ ,  $\tau^f$  increases in  $c_h$ , and the upgrade volume  $\tau^f(a - \bar{p}_h^f)/a$  decreases in  $c_h$ . We can similarly check the conditions for  $\bar{p}_h^f \leq a$  and  $\bar{p}_l^f \geq p_h^f - a$ .

(iii) The total battery capacity under flexible battery leasing is  $BT^f = (1 - \tau^f + Q_h^f)r_h$ .

We then compute total customer cost. The total cost of leasing low-capacity batteries in two periods under flexible program is

$$CT_l^f = \rho\mathbb{E}[d] + (1 - \rho)\mathbb{E}[c_l(D)] = \rho\tau^f/2 + (1 - \rho)\frac{a^2 - 2ar_h + r_h^2 + (2a - \bar{p}_h^f)\bar{p}_h^f}{2a},$$

The total cost of leasing high-capacity batteries in two periods under flexible program is

$$\begin{aligned} CT_h^f &= \rho\mathbb{E}[(d - r_h)^+ + p_h^f] + (1 - \rho)\mathbb{E}[c_h(D)] \\ &= \rho((1 - r_h)^2/(2(1 - \tau^f)) + p_h^f) + (1 - \rho)\frac{(a - r_h)^2 + 2ap_h^f - (p_h^f - \bar{p}_l^f)^2}{2a} \end{aligned}$$

when  $r_h \leq 1$ , and  $CT_h^f = p_h^f + (1 - \rho)((a - r_h)^2 - (p_h^f - \bar{p}_l^f)^2)/(2a)$  when  $r_h > 1$ .

The total customer cost is  $CT^f = \tau^f CT_l^f + (1 - \tau^f)CT_h^f$ .  $\square$

*Proof of Corollary 1.* We check the sign of  $\bar{p}_l^f$  under two cases.

$c_h < a(1 - \rho)/2$ . We find that  $\bar{p}_l^f \geq 0$  for  $a \leq 8\rho/(1 + 3\rho)$ . When  $a > 8\rho/(1 + 3\rho)$ ,  $\bar{p}_l^f < 0 \iff c_h > (1 - \rho)(5a(1 - \rho) + 8\rho)/(2 + 6\rho)$ . We can check that  $(1 - \rho)(5a(1 - \rho) + 8\rho)/(2 + 6\rho) < a(1 - \rho)/2$ .

$c_h \geq a(1 - \rho)/2$ . We find that  $\bar{p}_l^f < 0 \iff a > 4\rho/(1 + \rho)$  and  $c_h > [32\rho^2 + 4a\rho(5 - 9\rho) + a^2(11 - 24\rho + 13\rho^2)]/[8(a - 4\rho + a\rho)]$ . We can check that  $[32\rho^2 + 4a\rho(5 - 9\rho) + a^2(11 - 24\rho + 13\rho^2)]/[8(a - 4\rho + a\rho)] > a(1 - \rho)/2$ .  $\square$

*Proof of Proposition 3.* We compare manufacturer profit under simple and flexible battery leasing. Recall the profits in the proof of Propositions 1 and 2.

$c_h < a(1 - \rho)/2$ .

$$\Pi^f > \Pi^b \iff g_1(r_h, c_h, a, \rho) = \rho a^2[2(40 - a)(a - 2c_h) + (a - 2c_h)^2/\rho + \rho(64 - (80 - a)a)]$$

$$+ 64c_h^2/(a - a\rho)] - 16[r_h^2(1 - \rho) + 2(c_h - (1 - \rho)r_h - \rho)a]^2 > 0.$$

We find that  $g_1(r_h, c_h, a, \rho)$  is concave in  $c_h$  for  $\rho < 15a/(15a + 16)$ , and  $\partial g_1(r_h, c_h, a, \rho)/\partial c_h < 0$  at  $c_h = a(1 - \rho)/2$  for  $r_h > a/2$ . So  $g_1(r_h, c_h, a, \rho)$  is increasing in  $c_h \in [0, a(1 - \rho)/2]$ . We can also check that  $g_1(r_h, c_h = a(1 - \rho)/2, a, \rho) > 0$  for  $r_h > a/2$ . There exists  $c_h = (1 - \rho)[a(1 - \rho)(32ar_h - a^2 - 16r_h^2) - 8\rho a^2 - 4K]/[2a(15a(1 - \rho) - 16\rho)]$  such that  $g_1(r_h, c_h = c_h^k, a, \rho) = 0$ , where  $K = [a(a^5(1 - \rho)^2 + 16\rho(1 - \rho)r_h^4 - a^4(1 - \rho)(4r_h(1 - \rho) - 75\rho) + ar_h^2(r_h^2(1 - \rho)^2 - 64\rho(1 - \rho)r_h - 64\rho^2) + a^3(3r_h^2(1 - \rho)^2 - 76\rho(1 - \rho)r_h - 38\rho^2) - 4a^2r_h(r_h^2(1 - \rho)^2 + 35\rho(1 - \rho)r_h - 32\rho^2))]^{1/2}$ . Therefore,  $\Pi^f > \Pi^b$  holds for  $(1 - \rho)[a(1 - \rho)(32ar_h - a^2 - 16r_h^2) - 8\rho a^2 - 4K]^+ / [2a(15a(1 - \rho) - 16\rho)] < c_h < a(1 - \rho)/2$  for  $\rho < 15a/(15a + 16)$  and  $r_h > a/2$ .

$$\underline{c_h \geq a(1 - \rho)/2.}$$

$$\Pi^f > \Pi^b \iff K^a - K^n < c_h < K^a + K^n,$$

where  $K^a = [4ar_h(2a - r_h) - 6\rho a^2 + 16\rho ar_h - 8\rho r_h(a^2 - r_h) + 4\rho ar_h^2]/(8a^2)$  and  $K^n = (7a^2 - 8ar_h + 4r_h^2)\sqrt{2\rho(a(1 - \rho) - 2\rho)}/(8a^2)$ . We can check that  $K^a - K^n < a(1 - \rho)/2$  and  $K^a + K^n > a(1 - \rho)/2$ . Moreover, we have  $K^a + K^n > a(1 - \rho)$  for  $r_h > a/2$ . So  $\Pi^f > \Pi^b$  always hold over  $c_h \in [a(1 - \rho)/2, a(1 - \rho)]$  for  $r_h > a/2$ .  $\square$

*Proof of Proposition 4.* We compare the total customer cost under simple and flexible battery leasing. Note that  $CT^b - CT^f$  for  $r_h \leq 1$  and  $r_h > 1$  are the same, so it is enough to write out the comparing expression for  $r_h > 1$ .

$c_h < a(1 - \rho)/2$ . The total customer cost under flexible battery leasing for  $r_h > 1$  is

$$\begin{aligned} CT^f &= [4a^2(1 - \rho)^2(c_h + 108\rho) - a^3(1 - \rho)^3 - 64\rho(c_h^2 - 4r_h^2(1 - \rho)^2) \\ &\quad - 4a(1 - \rho)(c_h^2 - 40\rho c_h - 16\rho(3\rho - 8(1 - \rho)r_h))]/[512\rho(1 - \rho)a]. \end{aligned}$$

Now compare it with the total customer cost under simple battery leasing.

$$\begin{aligned} CT^b > CT^f \iff l_1(r_h, c_h, a, \rho) &= (1 - \rho)^3(16r_h^4 - a^4) + 4a^3(1 - \rho)^2(c_h + 44\rho) + 64a(c_h r_h^2(1 - \rho)^2 - \rho c_h^2 \\ &+ r_h^2(1 - \rho)^2((3 + r_h)\rho - r_h)) + 4a^2(1 - \rho)(15c_h^2 + 8c_h(\rho - 4(1 - \rho)r_h) + 16r_h(1 - \rho)(r_h - (6 + r_h)\rho)) < 0 \end{aligned}$$

When  $r_h \rightarrow a$  and  $c_h \rightarrow a(1 - \rho)/2$ , we have

$$l_1(r_h \rightarrow a, c_h \rightarrow a(1 - \rho)/2, a, \rho) = -16\rho(1 - \rho)^2 a^3 < 0.$$

Because the function is continuous,  $l_1(r_h, c_h, a, \rho) < 0$  holds when  $r_h$  and  $c_h$  are sufficiently large. Note that  $a$  is compared with  $r_h$  and  $a > r_h$ , so  $l_1(r_h, c_h, a, \rho) < 0$  when  $a$  is sufficiently low.

Similarly, we show that  $l_1(r_h, c_h, a, \rho) > 0$  for sufficiently large  $\rho$  as  $l_1(r_h, c_h, a, \rho \rightarrow 1) = -64ac_h^2 < 0$ .  $c_h \geq a(1 - \rho)/2$ . The total customer cost under flexible battery leasing for  $r_h > 1$  is

$$\begin{aligned} CT^f = & [463a^4(1 - \rho)^3 + 1024(1 - \rho)\rho^2r_h^2 + 4a^3(1 - \rho)^2(28c_h - 128(1 - \rho)r_h + 499\rho) \\ & - 256a\rho(c_h - 2r_h(1 - \rho) + \rho)(c_h + 2r_h - 3\rho - 2\rho r_h) - 64a^2(1 - \rho)(c_h^2 - 4r_h^2 \\ & - 9\rho c_h + 8\rho r_h(4 + r_h) - 4(10 + r_h(8 + r_h))\rho^2)]/[512a(a(1 - \rho) + 2\rho)^2]. \end{aligned}$$

Now we compare it with the total customer cost under simple battery leasing.

$$\begin{aligned} CT^b > CT^f \iff l_2(r_h, c_h, a, \rho) = & 16[(1 - \rho)^2r_h^4 - 16\rho(1 - \rho)a^3 + 4a^2(c_h - (1 - \rho)r_h \\ & + \rho)(c_h - r_h - (3 - r_h)\rho) + 4ar_h^2(1 - \rho)(c_h - (1 - \rho)r_h - \rho)]/\rho + a[463a^4(1 - \rho)^3 + 1024(1 - \rho)\rho^2r_h^2 \\ & + 4a^3(1 - \rho)^2(28c_h - 128r_h(1 - \rho) + 499\rho) - 256\rho a(c_h - 2r_h(1 - \rho) + \rho)(c_h + 2r_h - 3\rho - 2\rho r_h) \\ & - 64a^2(1 - \rho)(c_h^2 - 4r_h^2 - 9\rho c_h + 8\rho r_h(4 + r_h) - 4(10 + r_h(8 + r_h))\rho^2)]/[(1 - \rho)a + 2\rho]^2 < 0 \end{aligned}$$

When  $r_h \rightarrow a$  and  $c_h \rightarrow a(1 - \rho)/2$ , we have

$$l_2(r_h \rightarrow a, c_h \rightarrow a(1 - \rho)/2, a, \rho) = -\rho(1 - \rho)^2(9(1 - \rho)a + 20\rho)a^4 < 0.$$

Because the function is continuous,  $l_2(r_h, c_h, a, \rho) < 0$  holds when  $r_h$  is sufficiently large and  $c_h$  is sufficiently low. And  $l_2(r_h, c_h, a, \rho) < 0$  holds when  $a$  is sufficiently low.  $\square$

*Proof of Proposition 5.* We compare the total battery capacity under simple and flexible battery leasing.

$$\underline{c_h < a(1 - \rho)/2}.$$

$$BT^f = (1 - \tau^f)r_h + Q_h^f r_h \leq BT^b = (1 - \tau^b)r_h \iff \tau^f - Q_h^f \geq \tau^b,$$

which holds if and only if  $\rho < 7a/(8 + 7a)$  and  $c_h \leq (1 - \rho)[(16ar_h - a^2 - 8r_h^2)(1 - \rho) - 8a\rho]/[14a(1 - \rho) - 16\rho]$ . We can show that  $(1 - \rho)[(16ar_h - a^2 - 8r_h^2)(1 - \rho) - 8a\rho]/[14a(1 - \rho) - 16\rho] < a(1 - \rho)/2$  when  $\rho < 7a/(8 + 7a)$ .

$$\underline{c_h \geq a(1 - \rho)/2}.$$

$$\begin{aligned} BT^f = (1 - \tau^f)r_h \leq BT^b = (1 - \tau^b)r_h \iff \tau^f \geq \tau^b \\ \iff c_h \leq [2ar_h(4\rho - r_h(1 - \rho)) - 4\rho r_h^2 - a^2(3\rho - 4(1 - \rho)r_h)]/(4a^2), \end{aligned}$$

which is  $[2a(1 - \rho) + \rho]/4$  as  $r_h \rightarrow a$ . So  $BT^f \leq BT^b$  for  $r_h \rightarrow a$  and  $c_h \leq [2a(1 - \rho) + \rho]/4$ .  $\square$

*Proof of Proposition 6.* We search for a set of sufficient conditions for a win-win-win outcome based on the results in Lemma 4 and 5.

$c_h < a(1 - \rho)/2$ . From the proof of Lemma 4, the total customer cost is lower for flexible battery leasing when  $r_h \rightarrow a$  and  $c_h \rightarrow a(1 - \rho)/2$ . Now we compare total battery capacities under these conditions. When  $r_h \rightarrow a$ , we find

$$c_h \leq (1 - \rho)[(16ar_h - a^2 - 8r_h^2)(1 - \rho) - 8a\rho]/[14a(1 - \rho) - 16\rho] = a(1 - \rho)/2,$$

which holds as  $c_h \rightarrow a(1 - \rho)/2$ , and thus the total battery capacity is smaller for flexible than simple battery leasing as  $r_h \rightarrow a$ ,  $c_h \rightarrow a(1 - \rho)/2$ , and  $\rho < 7a/(8 + 7a)$ .

$c_h \geq a(1 - \rho)/2$ . From the proof of Lemma 4, the total customer cost is lower for flexible battery leasing when  $r_h \rightarrow a$  and  $c_h \rightarrow a(1 - \rho)/2$ . Now we compare total battery capacities under these conditions. From the proof of Proposition 5, the total battery capacity is smaller for flexible battery leasing as  $r_h \rightarrow a$ ,  $c_h \rightarrow [2a(1 - \rho) + \rho]/4$ . Because the functions are continuous, the win-win-win outcomes occur when  $r_h \rightarrow a$  and  $c_h \rightarrow a(1 - \rho)/2$ .

Combining the two cases of  $c_h < a(1 - \rho)/2$  and  $c_h \geq a(1 - \rho)/2$ , the win-win-win outcomes occur when  $c_h$  is moderate,  $r_h$  is sufficiently large, and  $\rho < 7a/(8 + 7a)$ .  $\square$

*Proof of Proposition 7.* With correlated regular and peak needs for range, a customer's peak need for range is  $corD \doteq \lambda d + (1 - \lambda)D$  for a realized  $d$ . We first solve for the peak-period upgrade volume. Recall customers' peak-period costs in Table 1. A customer leasing low-capacity batteries decides to upgrade if  $\lambda d + (1 - \lambda)D \geq \bar{p}_h$ , i.e.,  $\mathbb{P}(D \geq (\bar{p}_h - \lambda d)/(1 - \lambda)) = (a(1 - \lambda) - \bar{p}_h + \lambda d)/(a(1 - \lambda))$ . Given the regular-period low-capacity battery lease volume  $\tau$ , the peak-period upgrade volume is  $\tau \mathbb{E}_d[(a(1 - \lambda) - \bar{p}_h + \lambda d)/(a(1 - \lambda))] = \tau(2(1 - \lambda)a - 2\bar{p}_h + \lambda)/(2(1 - \lambda)a)$ .

Similarly, we can solve for the peak-period downgrade volume. A customer leasing high-capacity batteries downgrades if  $\lambda d + (1 - \lambda)D < p_h - \bar{p}_l$ , i.e.,  $\mathbb{P}(D < (p_h - \bar{p}_l - \lambda d)/(1 - \lambda)) = (p_h - \bar{p}_l - \lambda d)/(a(1 - \lambda))$ . Given the regular-period high-capacity battery lease volume  $1 - \tau$ , the peak-period downgrade volume is  $(1 - \tau)\mathbb{E}_d[(p_h - \bar{p}_l - \lambda d)/(a(1 - \lambda))] = (1 - \tau)(2p_h - 2\bar{p}_l - \lambda)/(2(1 - \lambda)a)$ .

(i) We next solve the peak-period problem (1) with additional battery acquisition, and obtain  $\bar{p}_h^c(p_h) = [2c_h + 2(1 - \rho)(1 - \lambda)a + (1 - \rho)\lambda]/(4 - 4\rho)$ ,  $\bar{p}_l^c(p_h) = p_h - c_h/(2 - 2\rho) - \lambda/4$ . Accordingly,  $Q_h^c(p_h) = [(1 - \rho)(2(1 - \lambda)a\tau - \lambda) - 2c_h]/(4(1 - \rho)(1 - \lambda)a)$  and the peak-period profit is  $[4c_h^2 - 4c_h(1 - \rho)(2(1 - \lambda)a\tau + \lambda) + (1 - \rho)^2(4(1 - \lambda)^2a^2\tau + \lambda^2 + 4a(1 - \lambda)(4(1 - \tau)p_h + \lambda\tau))]/[16a(1 - \rho)^2(1 - \lambda)]$ .

Then we study the customers' regular decisions. We obtain the expected peak-period cost for customers leasing low-capacity batteries by breaking up the integrals into two parts, which differs on using high- or low-capacity batteries.

$$\begin{aligned}
\mathbb{E}[c_l(\text{cor}D)] &= \frac{\bar{p}_h - \lambda d}{(1-\lambda)a} \int_{d\lambda}^{\bar{p}_h} \text{cor}D f(\text{cor}D) d \text{cor}D \\
&\quad + \frac{(1-\lambda)a - \bar{p}_h + \lambda d}{(1-\lambda)a} \int_{\bar{p}_h}^{(1-\lambda)a+d\lambda} ((\text{cor}D - r_h)^+ + \bar{p}_h) f(\text{cor}D) d \text{cor}D \\
&= \frac{(2\bar{p}_h - \lambda)(\bar{p}_h + d\lambda) + 2(2(1-\lambda)a - 2\bar{p}_h + \lambda)\bar{p}_h}{4(1-\lambda)a} \quad \text{for } r_h \geq (1-\lambda)a + \lambda.
\end{aligned}$$

The cost of leasing low-capacity batteries in two periods is  $\rho d + (1-\rho)\mathbb{E}[c_l(\text{cor}D)]$ .

Similarly, a customer leasing high-capacity batteries downgrades if  $\text{cor}D < p_h - \bar{p}_l$  in the peak period and keeps high-capacity batteries otherwise. The expected peak-period cost is

$$\begin{aligned}
\mathbb{E}[c_h(\text{cor}D)] &= \frac{2p_h - 2\bar{p}_l - \lambda}{2(1-\lambda)a} \int_{d\lambda}^{p_h - \bar{p}_l} (\text{cor}D + \bar{p}_l) f(\text{cor}D) d \text{cor}D \\
&\quad + \frac{2(1-\lambda)a - 2p_h + 2\bar{p}_l + \lambda}{2(1-\lambda)a} \int_{p_h - \bar{p}_l}^{(1-\lambda)a+d\lambda} ((\text{cor}D - r_h)^+ + p_h) f(\text{cor}D) d \text{cor}D \\
&= \frac{4(1-\lambda)ap_h - (2p_h - 2\bar{p}_l - \lambda)(p_h - \bar{p}_l - d\lambda)}{4(1-\lambda)a} \quad \text{for } r_h \geq (1-\lambda)a + \lambda.
\end{aligned}$$

The cost of leasing high-capacity batteries in two periods is  $\rho[(d - r_h)^+ + p_h] + (1-\rho)\mathbb{E}[c_h(D)]$ .

By comparing the costs of leasing high- and low-capacity batteries in two periods, a customer leases low-capacity batteries if  $\rho d + (1-\rho)\mathbb{E}[c_l(\text{cor}D)] \leq \rho[(d - r_h)^+ + p_h] + (1-\rho)\mathbb{E}[c_h(D)]$ . So the low-capacity lease volume with correlated needs for range is

$$\tau = \frac{4a(1-\lambda)(p_h - \bar{p}_h(1-\rho)) - (1-\rho)(p_h - \bar{p}_h - \bar{p}_l)(2(p_h + \bar{p}_h - \bar{p}_l) - \lambda)}{4\rho(1-\lambda)a - 2\lambda(1-\rho)(p_h - \bar{p}_h - \bar{p}_l)}.$$

Inserting  $\bar{p}_h^c(p_h)$ ,  $\bar{p}_l^c(p_h)$ , we have  $\tau^c(p_h) = (2(4p_h - (1-\rho)\lambda - c_h) - 3(1-\rho)(1-\lambda)a)/(8\rho + 2(1-\rho)\lambda)$ .

Then we solve the manufacturer's regular-period problem and obtain  $p_h^c = [6c_h + 8\rho + 5a(1-\rho)(1-\lambda) + 6(1-\rho)\lambda]/16$ . The optimal up/downgrade rates and additional battery quantity are

$$\bar{p}_h^c = [2c_h + (1+\rho)\lambda + 2a(1-\rho)(1-\lambda)]/[4(1-\rho)],$$

$$\bar{p}_l^c = [c_h(6 - 8/(1-\rho)) + 5a(1-\rho)(1-\lambda) + 8\rho + 2(1-3\rho)\lambda]/16,$$

$$Q_h^c = [(1-\rho)(a(1-\lambda)(2+a - (a-2c_h+3a\rho)/(\rho(4-\lambda)+\lambda)) + 2\lambda)/2 - 2c_h]/[4a(1-\rho)(1-\lambda)],$$

the low-capacity lease volume is  $\tau^c = (2+a)/4 + (2c_h - (1+3\rho)a)/(16\rho + 4(1-\rho)\lambda)$ , and the maximized profit is

$$\begin{aligned}
\Pi^c &= [2(10-a)(a-2c_h) + 2(8-a(10+a))\rho]/64 + [(4+a((20-a)a) - 20)(1-\rho)\lambda]/(64a) \\
&\quad + (a-2c_h+3a\rho)^2/(64\rho(4-\lambda)+\lambda) + (4(-1+2ch+rho)^2)/(64a(1-\rho)(1-\lambda)).
\end{aligned}$$

We now check  $\bar{p}_h \leq (1 - \lambda)a$  and  $p_h - \bar{p}_l \geq \lambda$  under  $\lambda \leq a/(a + 3)$  at the optimal solutions.

$$\bar{p}_h^c \leq (1 - \lambda)a \iff c_h \leq (1 - \rho)(2(1 - \lambda)a - \lambda)/2,$$

$$\bar{p}_l^c \leq p_h^c - \lambda \iff c_h \geq 3(1 - \rho)\lambda/2.$$

The optimal solution satisfies the conditions under  $3(1 - \rho)\lambda/2 \leq c_h \leq (1 - \rho)(2(1 - \lambda)a - \lambda)/2$ .

We then check the nonnegativity of high-capacity battery acquisition quantity.

$$Q_h^c > 0 \iff c_h < \frac{(1 - \rho)[2(1 - \lambda)(\rho(4 - \lambda) + \lambda)a - (1 - \rho)(1 - \lambda)^2 a^2 + 2\lambda(\rho(4 - \lambda) + \lambda)]}{4(4 - \lambda)\rho - 2a(1 - \rho)(1 - \lambda) + 4\lambda}.$$

The cost threshold increases in  $a$  and decreases in  $\rho$ .

(ii) Next we optimize the manufacturer's problems with  $Q_h = 0$  for  $c_h \geq (1 - \rho)[2(1 - \lambda)(\rho(4 - \lambda) + \lambda)a - (1 - \rho)(1 - \lambda)^2 a^2 + 2\lambda(\rho(4 - \lambda) + \lambda)]/[4(4 - \lambda)\rho - 2a(1 - \rho)(1 - \lambda) + 4\lambda]$ .

With the supply and demand equation in the peak period, we solve the manufacturer's peak-period problem, and obtain  $\bar{p}_l^c(p_h) = p_h - (a\tau(1 - \lambda) + \lambda)/2$ ,  $\bar{p}_h^c(p_h) = (a(1 + \tau)(1 - \lambda) + \lambda)/2$ , and the corresponding profit is  $(1 - \tau)(4p_h + a\tau(1 - \lambda))/4$ .

Inserting  $\bar{p}_h^c(p_h)$ ,  $\bar{p}_l^c(p_h)$ , the low-capacity lease volume becomes  $\tau^c(p_h) = [8p_h - 3(1 - \rho)(\lambda + (1 - \lambda)a)]/[2(1 - \rho)(1 - \lambda)a + 2\rho(4 - \lambda) + 2\lambda]$ . Then we solve the regular-period problem and obtain

$$p_h^c = \frac{13a^2(1 - \rho)^2(1 - \lambda)^2 + 2a(1 - \rho)(1 - \lambda)(4c_h + 9\rho(2 - \lambda) + 9\lambda) - (\rho(4 - \lambda) + \lambda)(8(c_h + \rho) + 5(1 - \rho)\lambda)}{16[\rho(4 - \lambda) + 2a(1 - \rho)(1 - \lambda) + \lambda]}.$$

The optimal up/downgrade rates are

$$\bar{p}_h^c = \frac{a(1 - \lambda)[a^2(1 - \rho)^2(9 + 4\lambda) + 8\rho(4c_h + 12\rho - (1 - \rho)\lambda) + 4a(1 - \rho)(2c_h + 3\rho(5 + \lambda) - \lambda)]}{16(a(1 - \rho) + 2\rho)(\rho(4 - \lambda) + a(1 - \rho)(1 - \lambda) + \lambda)} + \lambda/2,$$

$$\bar{p}_l^c = p_h^c - \bar{p}_h^c + a(1 - \lambda)/2,$$

the lease volume is  $\tau^c = [64\rho(c_h + \rho) - 48\rho(1 - \rho)\lambda + 2a^2(1 - \rho)^2(1 + 12\lambda) + 8(1 - \rho)(2c_h + 3\rho - 3\lambda + 9\rho\lambda)a]/[16(a(1 - \rho) + 2\rho)(\rho(4 - \lambda) + a(1 - \rho)(1 - \lambda) + \lambda)]$ , and the maximized profit is

$$\begin{aligned} \Pi^c = & [(a(1 - \rho) + 4\rho)(8(c_h - \rho) - 7(1 - \rho)a)/(4a(1 - \rho) + 8\rho) - 5(1 - a)(1 - \rho)\lambda][(12a(2c_h - 3\rho)(1 - \rho) \\ & - 13a^2(1 - \rho)^2 + 32\rho(c_h - \rho))(\rho(4 - \lambda) + \lambda)/(4a(1 - \rho) + 8\rho) + 3a^2(1 - \rho)^2(1 - \lambda)^2 - a(1 - \rho) \\ & (1 - \lambda)(13a^2(1 - \rho)^2 + 4\rho(8\rho - 3(1 - \rho)\lambda) - 2a(1 - \rho)(4c_h + 3\lambda - 3(6 + \lambda)\rho))/(2a(1 - \rho) + 4\rho)] \\ & / [16(\rho(4 - \lambda) + a(1 - \rho)(1 - \lambda) + \lambda)^2]. \end{aligned}$$

We can similarly check the conditions for  $\bar{p}_h \leq (1 - \lambda)a$  and  $p_h - \bar{p}_l \geq \lambda$ .

The total battery capacity under flexible battery leasing is  $BT^c = (1 - \tau^c + Q_h^c)r_h$ . We then compute total customer cost. The total cost of a customer leasing low-capacity batteries is  $CT_l^c = \rho\mathbb{E}[d] +$

$(1 - \rho)\mathbb{E}[c_i(\text{cor}D)]$ , and the total cost of a customer leasing high-capacity batteries is  $CT_h^c = \rho p_h^c + (1 - \rho)\mathbb{E}[c_h(\text{cor}D)]$ . So the total customer cost under flexible battery leasing with correlated regular and peak needs for range is  $CT^c = \tau^c CT_l^c + (1 - \tau^c)CT_h^c$ .  $\square$

*Proof of Lemma 5* We insert  $c_h = \theta r_h^2$  into the maximized profit in the proof of Proposition 2 and optimize  $r_h$ . Note that  $c_h < a(1 - \rho)/2$  implies  $r_h^2 < a(1 - \rho)/(2\theta)$ .  $\underline{r_h^2 < a(1 - \rho)/(2\theta)}$ . In this case, the manufacturer's profit is

$$\begin{aligned} \Pi^a(r_h) = & [a\rho(1 - \rho)(\rho(64 - (80 - a)a) + 2(40 - a)(a - 2\theta r_h^2)) + 64\rho\theta^2 r_h^2 \\ & + a(1 - \rho)(a - 2\theta r_h^2)^2]/[256a\rho(1 - \rho)]. \end{aligned}$$

The FOC yields  $r_h^0 = \sqrt{a(1 - \rho)[a(1 - \rho) + 40\rho]/[2\theta(a(1 - \rho) + 16\rho)]}$ . The second-order derivative is  $\partial^2 \Pi^a(r_h)/\partial r_h^2 = (6\theta r_h^2(1/\rho + 16/(a - a\rho)) - 40 - a(1 - \rho)/\rho)/(32\theta)$ . If  $\theta < [a^2(1 - \rho)^2 + 40a\rho(1 - \rho)]/[(96\rho + 6a(1 - \rho))r_h^2]$ , we have  $\partial^2 \Pi^a(r_h)/\partial r_h^2 < 0$ , and  $\partial^2 \Pi^a(r_h)/\partial r_h^2 \geq 0$  otherwise. We find that  $r_h^0 > \sqrt{a(1 - \rho)/(2\theta)}$ , so the profit is maximized at  $\sqrt{a(1 - \rho)/(2\theta)}$ .

$\underline{r_h^2 \geq a(1 - \rho)/(2\theta)}$ . In this case, the manufacturer's profit is

$$\Pi^n(r_h) = [8\theta r_h^2 - 7a(1 - \rho) - 8\rho]^2/[128(a(1 - \rho) + 2\rho)].$$

We find that  $\partial^2 \Pi^n(r_h)/\partial r_h^2 < 0 \iff 7a(1 - \rho) + 8(\rho - 3\theta r_h^2) > 0$ . We discuss three cases: (1)  $\rho < 5a/(8 + 5a)$ , we have  $\partial^2 \Pi^n(r_h)/\partial r_h^2 > 0$ ; (2)  $\rho > 17a/(8 + 17a)$ , we have  $\partial^2 \Pi^n(r_h)/\partial r_h^2 < 0$ ; (3)  $5a/(8 + 5a) \leq \rho \leq 17a/(8 + 17a)$ , we have  $\partial^2 \Pi^n(r_h)/\partial r_h^2 < 0$  if and only if  $r_h^2 < (7a(1 - \rho) + 8\rho)/(24\theta)$ .

- Case 1:  $\rho < 5a/(8 + 5a)$ . The profit is convex in  $r_h$ , and  $\Pi^n(r_h = \sqrt{a(1 - \rho)/(2\theta)}) > \Pi^n(r_h = \sqrt{a(1 - \rho)/\theta})$ . So the profit is maximized at  $\sqrt{a(1 - \rho)/(2\theta)}$ .
- Case 2:  $\rho > 17a/(8 + 17a)$ . The profit is concave in  $r_h$ , and  $\partial \Pi^n(r_h)/\partial r_h|_{r_h = \sqrt{a(1 - \rho)/\theta}} > 0$ . So the profit is maximized at  $\sqrt{a(1 - \rho)/\theta}$ . We can further check that  $\Pi^n(r_h = \sqrt{a(1 - \rho)/\theta}) < \Pi^a(r_h = \sqrt{a(1 - \rho)/(2\theta)})$ .
- Case 3:  $5a/(8 + 5a) \leq \rho \leq 17a/(8 + 17a)$ . The profit is concave in  $r_h$  if  $r_h^2 < (7a(1 - \rho) + 8\rho)/(24\theta)$  and convex otherwise. As  $\Pi^n(r_h = \sqrt{(7a(1 - \rho) + 8\rho)/(24\theta)}) > \Pi^n(r_h = \sqrt{a(1 - \rho)/\theta})$ , the profit is maximized at  $\sqrt{(7a(1 - \rho) + 8\rho)/(24\theta)}$ . We then compare the profits under  $r_h^2 < a(1 - \rho)/(2\theta)$  and  $r_h^2 \geq a(1 - \rho)/(2\theta)$ .

$$\Pi^n(r_h = \sqrt{(7a(1 - \rho) + 8\rho)/(24\theta)}) < \Pi^a(r_h = \sqrt{a(1 - \rho)/(2\theta)}) \iff \rho > 31a/(31a + 6\sqrt{69} - 2).$$

To summarize, the optimal range is  $r_h^* = \sqrt{a(1 - \rho)/(2\theta)}$  if  $\rho \leq 5a/(8 + 5a)$  or  $\rho \geq 31a/(31a + 6\sqrt{69} - 2)$ , and is  $r_h^* = \sqrt{(7a(1 - \rho) + 8\rho)/(24\theta)}$  if  $5a/(8 + 5a) < \rho < 31a/(31a + 6\sqrt{69} - 2)$ . We can further check that  $\sqrt{a(1 - \rho)/(2\theta)} < \sqrt{(7a(1 - \rho) + 8\rho)/(24\theta)}$ .  $\square$
